# Supplementary material for: Redistribution of lamina-associated domains reshapes binding of pioneer factor FOXA2 in development of nonalcoholic fatty liver disease
Source: HighWire-hosted journal article supplement (doi:10.1101/gr.277149.122), 2022-11-01
Supplement: Supplemental_Table_S1.xlsx [file Supplemental_Table_S1.xlsx]

## Sheet: TableS1
Table S1 Primer Sequences A list of primer sequences used for QPCR (Figure 4D), including Gapdh, Acaca, Fasn, and Srebf1.
Gene_Symbol	Gene_Name	GenBank_Accession	AmpliconSize	Foward_Primer	Reverse_Primer	Tm_For	Tm_Rev
Fasn	fatty acid synthase	NM_007988	93	AGAAGCCATGTGGGGAAGATT	AGCAGGGACAGGACAAGACAA	62.09	62.18
Srebf1	sterol regulatory element binding factor 1	NM_011480	132	gaggacctttgtcattggctg	tacagagcaagagggtgccat	61.957	62.106
Acaca	acetyl-Coenzyme A carboxylase alpha	NM_133360	87	GCTGGAGAAGCAACTGACAGAG	TTCAGGACATAGTCCCTGCTGA	61.65	62.09
Gapdh	glyceraldehyde-3-phosphate dehydrogenase	NM_008084	83	GATGACATCAAGAAGGTGGTGA	GAGACAACCTGGTCCTCAGTGT	59.97	60.6
