# Supplementary material for: Redistribution of lamina-associated domains reshapes binding of pioneer factor FOXA2 in development of nonalcoholic fatty liver disease
Source: HighWire-hosted journal article supplement (doi:10.1101/gr.277149.122), 2022-11-01
Supplement: Supplemental_Table_S2.xlsx [file Supplemental_Table_S2.xlsx]

## Sheet: WD8
Table S2 Differential gene expression in mice on Western diet A list of genes differentially expressed in wildtype heterozygous C57BL/6J (B6) /129S1/SvImJ (S129) mice fed Western diet (WD8 Tab 1, WD12 Tab 2, FDR < 5%) used to generate the Venn Diagram in Fig. 3
Gene_Symbol	logFC	logCPM	LR	PValue	FDR
Sqle	-4.82149	6.39665	376.436	7.42942e-84	7.7043e-80
Idi1	-4.35626	4.75535	258.272	4.08434e-58	2.11773e-54
Cyp51	-3.06311	7.26	227.409	2.18936e-51	7.56788e-48
Rdh11	-2.50239	6.05126	201.201	1.14228e-45	2.96137e-42
Nsdhl	-3.07208	6.2152	198.819	3.78084e-45	7.84146e-42
Tm7sf2	-1.9871	6.70449	146.351	1.08796e-33	1.88036e-30
Pmvk	-2.40905	5.60981	143.703	4.12505e-33	6.11097e-30
Gm43738	-2.45496	7.36451	137.996	7.30123e-32	9.46422e-29
Fdps	-2.61782	7.35885	136.986	1.2141e-31	1.39892e-28
Mvk	-2.42373	4.42269	132.456	1.18887e-30	1.23286e-27
Cyp26a1	-2.83981	4.38195	130.887	2.62088e-30	2.34551e-27
Enho	-3.11837	3.37987	130.818	2.71419e-30	2.34551e-27
Mvd	-2.81061	4.74218	114.75	8.92898e-27	7.12258e-24
Fdft1	-2.40945	6.46043	113.105	2.04638e-26	1.51578e-23
Lss	-2.04359	6.4189	105.84	7.99244e-25	5.52544e-22
Tcf24	-6.06088	3.22943	104.133	1.8916e-24	1.22599e-21
Dhcr7	-1.93702	6.60805	100.554	1.15184e-23	7.02623e-21
Chac1	4.1922	2.68762	98.7523	2.8614e-23	1.64849e-20
Fabp2	1.58934	6.2652	95.3525	1.59331e-22	8.69612e-20
Msmo1	-3.05552	7.73313	93.3122	4.46634e-22	2.3158e-19
Mpeg1	1.58313	5.93698	92.9589	5.33914e-22	2.63652e-19
Ntrk2	5.83032	4.20908	89.6427	2.85306e-21	1.34483e-18
Hmgcs1	-3.02828	8.42311	88.0117	6.50698e-21	2.9338e-18
Spry4	1.91835	4.3549	83.7401	5.64284e-20	2.43818e-17
Chrna4	-3.51141	3.1274	83.623	5.98735e-20	2.48355e-17
Adam11	1.8719	6.06617	83.1265	7.69676e-20	3.06982e-17
Snhg11	-1.88686	4.79891	75.5777	3.51311e-18	1.3493e-15
Pcsk9	-2.19572	5.84005	72.7479	1.47312e-17	5.4558e-15
Cd5l	1.41627	6.03227	68.9195	1.02564e-16	3.66756e-14
Obp2a	3.29516	3.78409	67.9465	1.67996e-16	5.70214e-14
Tmem28	2.82203	2.53827	67.9178	1.70459e-16	5.70214e-14
0610007P14Rik	-1.17787	5.88447	64.6149	9.10629e-16	2.95101e-13
Aldoc	-2.35667	3.42271	64.0448	1.21624e-15	3.82193e-13
Hcn3	1.67112	6.72697	61.9209	3.57541e-15	1.0905e-12
Zbtb16	1.93584	6.20759	56.4224	5.84608e-14	1.73211e-11
Hsd17b7	-1.50865	6.83302	53.9962	2.00878e-13	5.78639e-11
Gcat	-1.06825	5.95364	52.862	3.57828e-13	1.00289e-10
Slco2a1	-1.73502	5.99262	52.2146	4.97552e-13	1.35779e-10
Abcg5	1.8911	7.79383	49.4941	1.98971e-12	5.2906e-10
Gsta2	-1.61637	4.75636	48.6043	3.13179e-12	7.97258e-10
Acat2	-1.27703	6.00046	48.5916	3.15213e-12	7.97258e-10
Acot11	1.55685	4.92508	48.2831	3.68927e-12	9.10898e-10
1810011O10Rik	1.92861	5.43535	47.6647	5.05721e-12	1.21961e-09
Siglec1	1.39869	3.53924	47.5278	5.42283e-12	1.27806e-09
Cacna2d3	3.09902	4.0264	47.3256	6.01227e-12	1.3855e-09
Acss2	-1.45497	8.12125	46.5463	8.94774e-12	2.01713e-09
Omd	2.26499	2.73654	45.2103	1.76972e-11	3.90467e-09
Il1r1	1.82953	6.2735	43.784	3.66694e-11	7.92212e-09
Cenpp	1.4316	3.7564	43.4148	4.42826e-11	9.37164e-09
Fmn2	4.74679	2.54131	43.3323	4.61895e-11	9.5797e-09
Pklr	1.5218	8.61735	43.1386	5.09951e-11	1.0369e-08
2010003K11Rik	1.74226	2.95864	42.2872	7.88049e-11	1.57155e-08
Gsta4	-1.03742	5.7612	41.9278	9.47045e-11	1.85299e-08
Tmem97	-1.04895	5.62349	41.4756	1.1935e-10	2.29195e-08
Slc17a4	1.1081	5.86559	41.0826	1.45927e-10	2.75139e-08
Gstm3	-1.5352	5.4545	40.6346	1.83525e-10	3.39848e-08
Mmab	-1.5512	4.3948	40.5445	1.92189e-10	3.46453e-08
Efna3	-2.50164	2.62696	40.5285	1.93773e-10	3.46453e-08
Stap1	3.27632	2.49104	39.4541	3.35858e-10	5.90313e-08
Gstt2	-1.4014	5.44135	38.7881	4.72387e-10	8.16443e-08
Fam124a	1.61187	3.78963	37.3828	9.70745e-10	1.65027e-07
Rab11fip4	-1.93367	2.79848	37.0332	1.16137e-09	1.94249e-07
Stard4	-1.19187	7.1851	35.6897	2.31385e-09	3.80867e-07
Abcg8	1.63285	8.09155	35.5485	2.48782e-09	4.03105e-07
Slc22a7	1.16192	5.09755	35.4088	2.67274e-09	4.26404e-07
Sik1	-1.47669	4.54141	35.2301	2.92965e-09	4.6031e-07
Orm3	2.76638	3.33713	34.8707	3.52343e-09	5.45343e-07
Fam35a	0.880435	5.84318	32.2469	1.35772e-08	2.07053e-06
Mfsd2a	1.64032	6.63625	32.0556	1.49824e-08	2.2517e-06
Saa1	1.81435	4.81583	31.7879	1.71959e-08	2.54745e-06
Ginm1	0.839387	5.69021	31.704	1.79551e-08	2.61528e-06
Rtn4	0.789527	6.01995	31.6822	1.81582e-08	2.61528e-06
Rarres1	1.05328	6.00902	31.2199	2.30396e-08	3.27288e-06
Cbr1	-0.933575	5.41784	31.0319	2.53823e-08	3.55695e-06
Fam151a	1.59643	3.98216	30.5936	3.18145e-08	4.39888e-06
Smpd3	2.22298	2.59157	30.2084	3.88027e-08	5.29453e-06
Srebf2	-0.890355	5.98371	29.8513	4.66483e-08	6.26916e-06
Adgrv1	1.99684	3.34628	29.8304	4.71547e-08	6.26916e-06
Irs2	-1.16232	4.74892	29.6653	5.1345e-08	6.73984e-06
Sulf2	1.23689	4.19995	29.5846	5.35278e-08	6.86304e-06
Prlr	-0.974584	6.64996	29.5818	5.36072e-08	6.86304e-06
Cybb	1.20803	3.93875	29.4859	5.63239e-08	7.12292e-06
Sc5d	-1.2327	8.7797	29.0857	6.92456e-08	8.60804e-06
Etnppl	-1.07455	6.99355	29.0723	6.97277e-08	8.60804e-06
Lpl	2.0151	4.69127	29.0448	7.07225e-08	8.62814e-06
Cish	3.06219	3.51847	27.2472	1.79034e-07	2.15881e-05
Scarb1	0.860447	7.80899	26.944	2.09433e-07	2.49634e-05
Themis	2.87933	2.24271	26.8609	2.18637e-07	2.57644e-05
Insig1	-1.26728	8.18959	26.6976	2.37922e-07	2.77219e-05
Apom	-0.831836	7.08735	26.6379	2.45377e-07	2.82729e-05
Pctp	-0.846928	6.31098	26.4402	2.71831e-07	3.09768e-05
Cth	-0.980694	8.68907	26.3757	2.81055e-07	3.16798e-05
Herc6	0.897336	4.03801	26.1212	3.20648e-07	3.57539e-05
Hmgcr	-2.04693	7.49884	26.0321	3.35788e-07	3.70439e-05
Saa2	1.85067	3.59817	25.8511	3.688e-07	4.02574e-05
Vwa8	0.854089	7.87291	25.6951	3.99845e-07	4.2753e-05
Zfp395	-1.28876	5.52227	25.6948	3.99908e-07	4.2753e-05
Cd36	1.41494	6.28415	25.5328	4.34935e-07	4.60232e-05
Trim7	1.04196	4.585	25.5056	4.41098e-07	4.62039e-05
Serpina12	2.11512	4.87429	25.2458	5.04704e-07	5.23378e-05
Fmn1	-1.56913	3.75884	24.9774	5.80073e-07	5.90645e-05
Mbd1	0.858447	6.68009	24.9744	5.80962e-07	5.90645e-05
Fras1	-0.883115	4.62046	24.8558	6.17821e-07	6.2202e-05
Xaf1	1.53419	2.97288	24.5568	7.21504e-07	7.19423e-05
Clcn6	-1.11321	3.43428	24.3237	8.14295e-07	8.04213e-05
Lrtm1	2.82217	3.77041	24.0445	9.41368e-07	9.20942e-05
Col14a1	0.744025	5.60435	23.9988	9.63966e-07	9.34236e-05
Mgst3	-1.37953	3.4026	23.9596	9.83793e-07	9.44623e-05
Htatip2	-0.811381	5.11695	23.6786	1.13843e-06	0.000108308
Gstt3	-1.14989	6.03111	23.6007	1.18547e-06	0.000111758
Adra1b	-0.721638	6.26289	23.3591	1.34407e-06	0.000125568
Sdc3	0.792208	5.60059	23.1273	1.51619e-06	0.000140383
Sema5b	1.20438	3.55695	22.8961	1.71003e-06	0.000156929
Cyp2d40	0.890741	5.81115	22.7331	1.86131e-06	0.000169314
Tkfc	0.877909	9.05071	22.6929	1.90065e-06	0.000171389
Scpep1	-0.745318	5.52409	22.4166	2.1947e-06	0.000196199
Lcn2	2.72998	2.38492	22.2534	2.38939e-06	0.000211777
Hnmt	0.898342	4.97063	22.1527	2.51808e-06	0.000221292
Gramd3	-0.693677	5.57656	21.7973	3.0303e-06	0.000263414
AA986860	1.79483	3.08407	21.786	3.04818e-06	0.000263414
Hamp	-1.01523	8.62527	21.6662	3.24459e-06	0.000278069
A130010J15Rik	-0.790784	5.60845	21.6086	3.34341e-06	0.00028419
Agxt	-0.787442	7.38814	21.488	3.56045e-06	0.000299512
Gstm6	-1.00248	5.7937	21.4768	3.58144e-06	0.000299512
Figf	-1.62595	2.59444	21.4487	3.63419e-06	0.000301492
Bmyc	1.60842	2.54541	20.9115	4.81007e-06	0.000395877
Jade2	0.984213	3.5481	20.3185	6.5562e-06	0.000535337
Scd1	1.43555	13.6347	20.2404	6.82953e-06	0.000553298
Cntrl	0.743243	5.43531	20.2036	6.96226e-06	0.000559679
Lpin1	1.96453	8.83049	20.1085	7.31711e-06	0.00058368
Ropn1l	-1.12511	3.18107	20.0876	7.39757e-06	0.000585594
Fyb	1.01311	3.25176	20.0293	7.62633e-06	0.000597905
Pnp	-0.658947	6.01989	20.0188	7.6684e-06	0.000597905
C1qb	0.675166	4.51273	19.818	8.51748e-06	0.000659152
Hes6	-0.735045	5.80332	19.8011	8.59351e-06	0.000660109
Pla2g7	1.33529	2.87686	19.7323	8.90839e-06	0.000679265
Srebf1	0.966071	8.76013	19.6165	9.46502e-06	0.00071644
Dhcr24	-0.929164	9.62917	19.4158	1.05134e-05	0.000790029
Capn10	-0.791314	4.27861	19.3989	1.0607e-05	0.000791326
Arhgef26	1.11321	6.10813	19.3248	1.10267e-05	0.000816761
Lepr	1.47188	2.66656	19.2583	1.14174e-05	0.000836818
Prg4	0.825539	5.50876	19.2514	1.14588e-05	0.000836818
Aim1	0.845602	5.14461	19.1988	1.17787e-05	0.00085416
Cyp4a12b	1.55374	6.12988	19.1512	1.20759e-05	0.000869629
Fry	1.59609	2.55564	18.9834	1.31863e-05	0.000943048
Stk38l	-0.938229	4.3084	18.752	1.48868e-05	0.00105737
Raet1e	-1.68149	2.99558	18.7155	1.51741e-05	0.00107044
Grb7	-0.61254	6.65857	18.6776	1.54794e-05	0.00108461
Snx10	0.99031	5.25251	18.6165	1.59832e-05	0.00111016
Chad	-1.10265	3.2382	18.6076	1.60582e-05	0.00111016
Anks1	0.75133	5.31145	18.4877	1.71006e-05	0.00117439
Abcg2	0.667166	7.3063	18.1856	2.00393e-05	0.0013583
Aldh1b1	-0.816618	5.63564	18.1854	2.00404e-05	0.0013583
Acta1	-7.67689	2.94861	17.9875	2.2236e-05	0.00149732
Hip1r	-0.869904	5.11025	17.9194	2.30464e-05	0.00154188
Gm7030	1.46366	2.51729	17.8982	2.33042e-05	0.00154913
Gadd45g	2.8113	4.05335	17.7616	2.50392e-05	0.00165386
Tmie	1.03189	4.56725	17.6651	2.63414e-05	0.00172886
Dio1	0.73068	6.96812	17.6373	2.67288e-05	0.00174326
Gck	0.989213	8.18903	17.5625	2.78019e-05	0.00180191
Setd4	-1.28377	3.91894	17.4801	2.90323e-05	0.00186997
Slc25a1	-0.735415	7.48096	17.4028	3.02388e-05	0.00193565
F2r	0.697735	5.38455	17.3001	3.19166e-05	0.00203052
Gna14	0.985724	3.82573	17.1625	3.4314e-05	0.00216973
Wdfy4	1.44928	2.72004	17.138	3.47599e-05	0.00218461
Dact2	-1.04826	3.21636	17.0959	3.5539e-05	0.00222012
Tmem55b	-0.567785	5.28594	17.0374	3.66498e-05	0.0022758
Sult1d1	1.02189	7.69218	16.9876	3.76246e-05	0.00232242
Akr1c12	-0.60133	5.88521	16.9087	3.92222e-05	0.00240671
Ttbk1	1.52292	2.22721	16.8155	4.11953e-05	0.00251292
Cyp2a4	-3.89592	5.78903	16.7996	4.1543e-05	0.0025193
Ugdh	-0.727832	8.02028	16.768	4.22402e-05	0.00254669
Ttn	-6.12048	2.63523	16.7185	4.33562e-05	0.00259853
Vcam1	1.31608	3.45965	16.7078	4.36012e-05	0.00259853
Scara5	1.48278	4.67029	16.6167	4.57467e-05	0.00271082
Irf6	-0.826546	5.81901	16.5354	4.77513e-05	0.00281353
Pdk4	-1.17087	3.28566	16.4979	4.87031e-05	0.00285339
Cyp3a11	-0.863825	12.1002	16.2814	5.45983e-05	0.00318081
Saa4	0.761273	8.456	16.2308	5.60752e-05	0.00323822
Adgre1	0.720801	4.06521	16.2263	5.62082e-05	0.00323822
Gramd1b	1.13762	2.70435	16.101	6.00514e-05	0.00344052
Itih5	-0.767653	4.01283	16.0052	6.31685e-05	0.00359921
Gas2	-0.672364	5.82511	15.9674	6.44423e-05	0.00365173
Ebp	-0.589813	7.37599	15.9422	6.53049e-05	0.00367055
Nr2c1	-0.729867	4.52196	15.9371	6.54824e-05	0.00367055
Tmco6	-1.02954	3.03801	15.894	6.69899e-05	0.00373487
Slc25a30	0.946865	4.23417	15.8592	6.82338e-05	0.00376868
Tgm1	-1.64471	3.07812	15.8567	6.83232e-05	0.00376868
Mlkl	1.22003	2.51234	15.8391	6.89633e-05	0.00378386
Qdpr	-0.6811	8.37173	15.8169	6.9775e-05	0.00379767
Tmem256	-0.642625	4.96853	15.8123	6.99475e-05	0.00379767
Slc39a2	-1.84018	2.54548	15.7616	7.18445e-05	0.00388035
Plscr1	0.896423	3.68951	15.7201	7.34403e-05	0.00394599
Zfp276	0.802695	4.93315	15.7063	7.39787e-05	0.00395443
Arhgef37	0.84879	3.99342	15.6545	7.60313e-05	0.00404331
Acer2	0.951689	4.46659	15.6323	7.69305e-05	0.00407025
6330416G13Rik	1.02519	3.44818	15.6131	7.77159e-05	0.00409093
Stat1	0.640037	5.70403	15.5834	7.89459e-05	0.00413469
Clec4f	0.589961	6.18413	15.522	8.15524e-05	0.00424974
Pde4c	-0.766976	5.6087	15.4319	8.55323e-05	0.00443485
Plscr2	0.660051	5.02271	15.2926	9.20759e-05	0.00475038
Zfp707	-0.865955	4.90207	15.0969	0.000102128	0.00524293
Susd4	-0.629187	5.94227	15.0438	0.000105046	0.0053427
Slc20a1	0.692615	5.6341	15.0428	0.000105102	0.0053427
Ccl9	-0.897323	5.75893	15.0212	0.000106312	0.00537782
Cyp1a2	-0.742937	9.33902	14.9801	0.000108649	0.00546939
C6	1.02925	8.72741	14.9111	0.000112698	0.00564579
Ces1f	-0.644743	8.84542	14.7842	0.00012054	0.00598424
Samd9l	0.92866	3.61476	14.7753	0.000121113	0.00598424
Bbc3	-1.36708	2.73907	14.7742	0.000121185	0.00598424
Steap4	0.733042	7.33912	14.7107	0.000125332	0.00615967
Clca3a1	1.14681	2.91678	14.6416	0.00013001	0.00635944
Syne1	0.651562	5.70296	14.5968	0.000133143	0.00642896
Aprt	-0.742287	3.86507	14.5866	0.000133866	0.00642896
Cd44	0.999807	3.48487	14.5776	0.000134503	0.00642896
Glce	-0.725709	4.98475	14.5714	0.000134947	0.00642896
Zkscan7	0.63967	4.01542	14.5703	0.000135024	0.00642896
Cdkn1a	1.7111	4.19605	14.5686	0.000135151	0.00642896
Slc39a14	0.676336	7.89239	14.4833	0.000141405	0.00669577
Rnd1	-0.757682	3.54475	14.4694	0.000142456	0.00671486
Atp2a1	-5.80868	2.66645	14.4123	0.000146842	0.00687605
Khk	0.676164	8.79686	14.4077	0.000147202	0.00687605
1810055G02Rik	0.875398	5.59232	14.3675	0.000150377	0.00699287
Ticam1	0.893707	4.05309	14.3331	0.00015315	0.00708835
Pnpla7	0.632382	6.89931	14.3226	0.000154001	0.00708835
Plin4	1.64908	3.85828	14.3168	0.000154481	0.00708835
Laptm5	0.697637	3.76687	14.2962	0.000156184	0.00709138
Irs1	-0.670482	5.19579	14.2907	0.000156636	0.00709138
Acsl3	-0.714775	5.76972	14.2902	0.000156681	0.00709138
Tap1	0.717221	4.3534	14.283	0.000157282	0.00709138
Fmo5	0.768178	10.4769	14.2588	0.000159317	0.00715204
Gm9747	-0.814817	4.13768	14.2303	0.000161748	0.00722987
Glp2r	0.984538	3.68118	14.2191	0.000162707	0.00724153
Abcd2	-2.68446	2.85139	14.2065	0.0001638	0.00725899
Cyp2c55	-1.29633	2.7482	14.1058	0.000172807	0.00760809
Elovl1	-0.675536	5.06035	14.1022	0.000173144	0.00760809
Ugp2	0.658699	8.6543	14.042	0.00017877	0.00782213
B4galt1	0.653652	5.83614	14.0215	0.000180731	0.00787471
Arhgap30	1.15677	2.59083	14.0108	0.000181768	0.00788677
Fkbp5	1.4211	6.01259	13.9718	0.000185572	0.00799476
RP23-234F23.1	1.03976	4.02285	13.9578	0.000186962	0.00799476
Ces1e	-0.755567	8.12252	13.9498	0.000187757	0.00799476
Tnfaip3	1.35316	2.22041	13.9449	0.00018825	0.00799476
Mapk15	-0.856068	3.88374	13.9432	0.00018842	0.00799476
Nup210	0.602244	4.42481	13.9386	0.000188883	0.00799476
Dpy19l3	-0.94983	4.98171	13.849	0.000198097	0.00835067
Lbr	-0.650177	4.12615	13.7961	0.000203763	0.00855475
C1qc	0.600356	4.32017	13.6168	0.000224176	0.00937379
Ces2a	-0.646026	8.38754	13.6021	0.000225937	0.00940717
Ifit2	1.36463	2.22557	13.595	0.000226788	0.00940717
A530084C06Rik	1.92087	2.49024	13.5774	0.000228931	0.00943298
Chchd10	-0.647147	7.23994	13.5749	0.00022923	0.00943298
Mrpl15	-0.532175	5.50874	13.5282	0.000235009	0.00963259
Pgm3	0.768307	4.65343	13.4906	0.000239759	0.0097886
Hsd17b11	0.730099	8.00669	13.4423	0.00024602	0.0100048
Rpl34	-0.622258	5.57283	13.2989	0.000265555	0.010757
Psmb9	0.855627	3.38939	13.2665	0.000270192	0.0109023
Fanca	0.839167	3.61762	13.2518	0.000272321	0.0109456
Csf1r	0.536246	5.4312	13.2389	0.000274197	0.010954
Ttc39a	2.02897	2.2854	13.2359	0.000274643	0.010954
Eef2k	-0.761477	3.86926	13.1482	0.000287803	0.0114349
Rras	-0.804149	3.66251	13.1052	0.000294474	0.0116553
Dcun1d3	0.721806	4.4504	13.083	0.000297992	0.0117497
Ctss	0.659744	4.43935	13.0097	0.000309888	0.0121725
Rps10	-0.537361	5.16829	12.9685	0.000316784	0.0123964
Parp14	0.573467	5.08867	12.9176	0.000325508	0.0126899
Anxa2	0.944471	4.35373	12.9039	0.000327892	0.012735
Gm20441	-0.629499	7.76996	12.8884	0.000330623	0.0127931
Zfpm1	-0.714418	5.07818	12.8567	0.000336269	0.0129495
Apoa4	1.29206	8.97325	12.8518	0.000337161	0.0129495
Abca1	0.624596	8.18247	12.8395	0.000339373	0.0129863
Ldlr	-0.671492	7.53439	12.7844	0.000349517	0.0133253
H2-T24	1.05213	3.01793	12.76	0.00035411	0.013451
Gas1	-0.749017	3.59396	12.7342	0.000359032	0.0135882
Ly6e	0.594033	6.78757	12.7103	0.000363654	0.0137009
Rgs16	2.50525	6.19992	12.7051	0.000364652	0.0137009
Slc17a8	0.851163	5.87065	12.6133	0.000383021	0.0143391
CH25-588N10.2	0.900525	3.17603	12.5651	0.000393018	0.0146604
Ifit1	1.5359	2.12313	12.497	0.000407616	0.015059
Il18bp	0.915614	3.07417	12.4961	0.000407798	0.015059
BC089597	-1.12393	5.31519	12.4929	0.000408494	0.015059
Mef2d	-0.493695	5.46153	12.4883	0.000409512	0.015059
Slc13a3	0.689252	4.91655	12.4727	0.000412953	0.0151319
Rnf186	-1.19207	2.73563	12.4321	0.000422009	0.0154093
Gls2	-0.735304	8.15097	12.378	0.000434414	0.0158066
Gm5424	-0.604915	5.82119	12.371	0.000436059	0.0158109
Maoa	-0.801563	3.74247	12.355	0.0004398	0.015891
Scd2	0.765745	3.77426	12.324	0.000447161	0.0161009
Wdr45b	0.573783	5.31065	12.2098	0.000475379	0.0170577
Nxpe2	0.670708	4.88806	12.1825	0.000482401	0.01725
Spata2l	0.789211	4.85424	12.0847	0.000508369	0.0181161
Zfp37	1.48969	3.36891	11.9952	0.000533365	0.0189418
Pnrc1	-0.996003	6.08335	11.8779	0.000568048	0.0200911
Scap	-0.518163	7.0322	11.8728	0.000569604	0.0200911
Gjb2	-0.558047	7.95198	11.8517	0.000576082	0.0202508
Eif4ebp3	1.23306	4.81218	11.8386	0.000580143	0.0203246
Foxq1	1.73769	3.70179	11.717	0.000619333	0.0216245
Il13ra1	0.574112	5.22429	11.6952	0.000626601	0.0218049
Tceal8	0.862236	3.87826	11.6889	0.000628731	0.0218058
Abcg1	0.998245	2.95515	11.6171	0.000653494	0.0225891
Mndal	0.534316	4.98559	11.5618	0.000673219	0.0231936
Mad1l1	0.745821	4.47657	11.5408	0.000680859	0.0233792
Ralgps2	0.545743	4.92671	11.5245	0.000686835	0.0235065
D130043K22Rik	-1.06008	3.20882	11.4831	0.00070232	0.0239574
Acacb	-1.10805	6.88227	11.4684	0.000707907	0.0240688
Eno3	-1.09224	2.4007	11.4514	0.000714407	0.0242105
Gstm1	-0.682957	10.0953	11.4356	0.000720505	0.0243376
Cyb5b	-0.639745	9.29605	11.4089	0.000730945	0.0246101
Myh4	-6.1674	2.1858	11.374	0.000744808	0.0248968
Gss	-0.548171	6.40283	11.3732	0.000745105	0.0248968
Zfp53	0.923743	3.21884	11.3693	0.000746663	0.0248968
Antxr2	-0.598767	4.99822	11.3575	0.000751457	0.0249763
Glrx	0.786805	5.55305	11.345	0.000756523	0.0250644
Orm2	1.09395	2.69809	11.3151	0.000768797	0.0253899
Wdr81	-0.463511	5.69914	11.3008	0.000774756	0.0255054
Brd9	0.719507	3.663	11.2914	0.000778671	0.0255532
Ppip5k2	0.517426	6.41259	11.2572	0.000793136	0.0259458
Rcsd1	0.916348	2.74554	11.2107	0.000813279	0.0265101
Pip4k2b	-0.526391	4.86561	11.2022	0.000816995	0.0265101
Tpd52	0.559208	4.18162	11.1998	0.000818055	0.0265101
Uap1	0.612703	6.05306	11.1544	0.000838346	0.027083
Grem2	1.47833	3.93851	11.0587	0.00088272	0.028428
Zyg11a	1.15713	2.8683	11.044	0.000889726	0.0285649
Parp4	0.658693	6.36137	11.0279	0.000897503	0.0287256
Prrc1	0.522161	5.56107	11.0208	0.000900971	0.0287479
Sgms2	-0.507334	5.86902	11.0012	0.000910546	0.0289643
Fau	-0.485993	6.07259	10.9782	0.000921896	0.0291296
Cd163	0.712133	4.40824	10.9756	0.000923186	0.0291296
Ucp2	0.639687	4.36567	10.9707	0.000925639	0.0291296
Rps2	-0.55801	7.16532	10.968	0.000926979	0.0291296
Gm7694	0.863264	3.15724	10.9445	0.000938795	0.0294015
Gfra1	0.672184	7.57388	10.9378	0.000942223	0.0294015
1700040L02Rik	1.04503	3.56233	10.934	0.000944137	0.0294015
Mylip	0.728159	3.97819	10.8866	0.000968625	0.0300738
Irak2	-0.531812	5.00723	10.8723	0.000976119	0.030216
Slc39a4	-0.725546	5.67271	10.8431	0.00099162	0.0306045
Gin1	0.785927	4.62878	10.8336	0.000996732	0.0306378
Avpr1a	-1.08585	4.49642	10.8301	0.00099861	0.0306378
Rnf217	0.516591	5.07262	10.8221	0.00100297	0.030681
Acot3	-2.18248	3.37829	10.8106	0.00100923	0.0307814
Casp3	-0.604107	4.90686	10.7984	0.00101587	0.0308933
1600002H07Rik	-1.1289	6.12059	10.7886	0.0010213	0.0309674
Ctsa	-0.603327	6.94946	10.7389	0.00104906	0.0317164
Kctd12	0.56173	4.07942	10.7248	0.0010571	0.0318666
Akr1c13	-0.493841	6.27223	10.7118	0.00106456	0.0319475
Camk1d	-0.750258	5.91738	10.7094	0.00106594	0.0319475
Rpl36	-0.501441	5.6306	10.6946	0.00107446	0.0320589
Rnps1	-0.951483	3.21835	10.6923	0.00107585	0.0320589
Clec1b	0.850611	3.0384	10.6824	0.00108159	0.0321377
Mrps27	-0.524216	5.28314	10.6707	0.00108844	0.0322488
Opn3	-1.10353	2.1522	10.6584	0.00109574	0.0323727
Pik3r1	0.529194	6.9019	10.6453	0.00110352	0.0325099
Abca8a	-0.601402	7.05908	10.638	0.00110788	0.0325458
Mylk	0.48428	7.23079	10.6316	0.00111171	0.032561
Moxd1	3.73135	2.80753	10.6267	0.00111467	0.032561
Lrif1	0.680749	3.74631	10.6156	0.00112136	0.0326643
Chd1l	0.806742	4.44392	10.6095	0.00112509	0.0326812
Irf7	0.768979	3.92147	10.5945	0.00113427	0.0328558
Trim28	-0.471416	6.52353	10.5249	0.00117779	0.0340213
Tecr	-0.548967	7.48347	10.4797	0.00120695	0.0347669
Cep85	1.8439	7.43357	10.4681	0.00121454	0.0348362
Fads1	-0.83377	8.81759	10.4637	0.00121746	0.0348362
Lrrk1	0.502182	4.5942	10.4607	0.00121943	0.0348362
Exoc3l2	-0.718983	3.64605	10.4408	0.00123265	0.0351169
Prmt9	0.546922	4.04788	10.4348	0.00123662	0.0351337
Cpeb2	0.730583	6.74382	10.4085	0.00125439	0.0355409
Wwox	-0.573253	5.04045	10.378	0.00127524	0.0360332
B4galnt1	-0.492476	6.0525	10.3607	0.00128723	0.0361793
Creb3l2	0.601348	5.56083	10.3605	0.00128738	0.0361793
Msrb2	0.74067	3.57578	10.3016	0.00132913	0.0372517
Serpine2	1.67986	3.71322	10.2932	0.00133519	0.0373204
Crybg3	-0.513907	4.22292	10.2787	0.00134571	0.0374641
Sgk2	-0.670402	5.85796	10.2762	0.00134755	0.0374641
Ypel2	-0.943712	4.82406	10.2487	0.00136783	0.0379263
Grpel2	-0.652226	5.36572	10.1774	0.00142173	0.0392809
Bgn	0.466459	6.02734	10.1738	0.00142454	0.0392809
Tcirg1	-0.514395	5.12106	10.1692	0.00142805	0.0392809
Marveld2	-0.909278	3.35293	10.154	0.00143985	0.0395008
Slc19a2	-0.597139	7.17028	10.1412	0.00144988	0.039671
Tfrc	-0.583935	5.44753	10.0886	0.00149186	0.040712
Mug1	0.609846	12.1454	10.0762	0.001502	0.0408813
Fam129b	0.79296	3.31909	10.0638	0.00151212	0.0410489
Scarf1	-0.566821	4.62515	10.048	0.00152513	0.0412897
Eif4e3	0.952028	2.85159	10.0434	0.00152895	0.0412897
Csad	-1.41313	8.33723	10.0373	0.00153399	0.0413182
Arrdc4	-0.7086	3.75155	10.0229	0.00154609	0.0415362
Ankhd1	0.569474	6.61029	10.0123	0.00155494	0.041666
Echdc1	-0.472276	6.96139	9.94316	0.00161448	0.0431498
Tlcd2	-0.561971	7.21579	9.9296	0.00162642	0.0433573
Slc25a25	-0.605509	7.50239	9.90173	0.00165123	0.0439058
Dedd2	-0.755438	4.72285	9.79962	0.00174548	0.0462931
Pkdcc	-0.663234	4.06008	9.76326	0.00178034	0.0470973
Pxdc1	-0.538332	5.82339	9.73589	0.00180705	0.0476253
Tyrobp	1.00203	2.5163	9.73341	0.00180949	0.0476253
Itga5	-0.728901	4.73563	9.70221	0.00184047	0.0483181

## Sheet: WD12
Gene_Symbol	logFC	logCPM	LR	PValue	FDR
Sqle	-4.67548	6.10037	199.341	2.90888e-45	6.426e-41
Lcn2	4.12804	3.98951	187.987	8.74517e-43	9.65948e-39
Rgs16	5.41339	4.53116	168.672	1.44275e-38	1.06239e-34
Themis	4.6908	3.09841	154.597	1.71538e-35	9.47364e-32
2010003K11Rik	3.39008	4.56393	120.43	5.09328e-28	2.25031e-24
Ifi27l2b	4.13611	3.78339	92.6705	6.17662e-22	2.27413e-18
Idi1	-3.64559	7.52032	91.5323	1.09788e-21	3.46475e-18
Ntrk2	4.70133	3.7881	84.2021	4.4669e-20	1.23348e-16
Cidea	9.32341	3.87379	82.2624	1.19168e-19	2.92505e-16
Pnpla3	5.19204	1.67374	80.7598	2.54892e-19	5.63082e-16
Enho	-3.69087	3.73738	78.6395	7.45427e-19	1.49702e-15
Msmo1	-2.55565	7.06257	76.116	2.67484e-18	4.92416e-15
Stap1	5.05827	2.82363	75.2146	4.22225e-18	7.1749e-15
S100a11	3.93733	3.44061	74.2685	6.81831e-18	1.07588e-14
H2-Q1	3.01812	2.78164	72.8518	1.39758e-17	2.05827e-14
Tceal8	2.87864	4.63543	72.4737	1.69273e-17	2.33714e-14
Col1a1	2.57525	2.9293	69.9513	6.0786e-17	7.89896e-14
Nsdhl	-2.15669	5.93113	65.8217	4.93614e-16	6.05801e-13
Cxcl9	2.99268	3.7105	65.6938	5.26712e-16	6.12399e-13
Slc2a4	6.86281	2.17561	63.3568	1.72462e-15	1.90493e-12
Saa2	2.85145	5.58758	61.1579	5.26762e-15	5.32835e-12
Fam124a	2.35161	4.07466	61.1435	5.3064e-15	5.32835e-12
Mmp12	5.33662	1.77534	59.4919	1.22796e-14	1.17943e-11
Adgrv1	3.45855	3.19966	58.6867	1.8489e-14	1.70183e-11
Cyp2a22	3.41659	2.71437	58.1223	2.46319e-14	2.17657e-11
Mogat1	4.23626	2.92076	57.9574	2.67861e-14	2.27589e-11
Anxa2	2.6069	4.55147	57.5598	3.27864e-14	2.68254e-11
Omd	2.85592	2.4574	57.0519	4.24452e-14	3.34878e-11
Cidec	4.30214	4.59602	56.7374	4.98079e-14	3.79416e-11
Col3a1	1.89867	4.60809	55.9622	7.38781e-14	5.44014e-11
Ly6d	7.11566	3.29989	54.9972	1.20705e-13	8.60157e-11
Sulf2	1.99548	4.19128	54.6325	1.45312e-13	1.00315e-10
Pakap	1.68564	4.35919	53.8238	2.19304e-13	1.42561e-10
Fdft1	-1.93238	6.26025	53.8228	2.19415e-13	1.42561e-10
Tm7sf2	-1.7513	6.37174	53.2521	2.93373e-13	1.85169e-10
S100a10	1.98623	6.51487	52.6689	3.94787e-13	2.41175e-10
Rab11fip4	-3.06673	2.73588	52.6239	4.03942e-13	2.41175e-10
Gpc1	2.7798	4.03843	50.7441	1.05227e-12	6.11731e-10
Tcim	2.47668	5.77877	50.5489	1.16231e-12	6.58372e-10
Fabp2	2.28246	6.42822	49.7687	1.72982e-12	9.55336e-10
Treh	3.72251	2.70869	48.4415	3.40287e-12	1.83348e-09
Hmgcr	-2.17506	6.65827	48.3539	3.55831e-12	1.87159e-09
Etnppl	-1.90341	6.75837	47.5315	5.41266e-12	2.78072e-09
Hspa1b	-2.02424	7.01201	47.3627	5.89945e-12	2.96192e-09
Gm4070	3.7002	3.47053	47.2465	6.25979e-12	3.073e-09
Slc17a4	1.69131	5.50901	46.4126	9.57966e-12	4.60053e-09
Serpina7	2.2818	5.07664	45.9646	1.20409e-11	5.65948e-09
Pmvk	-1.76833	4.81366	45.3874	1.61674e-11	7.44071e-09
A4gnt	7.53173	0.725942	44.8081	2.17324e-11	9.79777e-09
Slco1a4	-1.82996	5.71524	44.6642	2.33898e-11	1.03203e-08
Bmyc	2.36939	3.78949	44.628	2.38258e-11	1.03203e-08
Abca8a	-1.83417	6.12349	44.3782	2.70684e-11	1.14994e-08
Tmsb10	2.16269	3.34957	44.2734	2.85569e-11	1.19029e-08
Gdf15	2.12659	3.27616	44.0848	3.14459e-11	1.28643e-08
Itih5	-2.01132	3.77744	43.4936	4.25348e-11	1.70843e-08
Mpeg1	1.88241	5.97128	43.22	4.89169e-11	1.92968e-08
Sik1	-2.0811	5.12353	43.1322	5.11639e-11	1.98291e-08
Dpy19l3	-1.9047	4.59367	42.9849	5.51636e-11	2.10107e-08
H3c14	7.88137	0.991598	42.931	5.67059e-11	2.1232e-08
Tpm2	2.44809	2.83887	42.8312	5.96718e-11	2.19702e-08
Lss	-1.70261	6.04096	42.0744	8.78671e-11	3.18209e-08
Rdh11	-1.92733	5.41105	41.8128	1.00446e-10	3.57894e-08
Gstt3	-1.54242	5.49803	41.3051	1.30229e-10	4.56649e-08
Samd9l	1.76351	3.90387	40.9143	1.59053e-10	5.49005e-08
Slco2a1	-2.12159	5.46548	40.804	1.68291e-10	5.71957e-08
Fabp4	2.48593	2.94238	40.1854	2.30965e-10	7.73069e-08
Col1a2	1.70545	3.43761	39.1423	3.94021e-10	1.29915e-07
Lgals3	2.6371	2.47165	39.0278	4.17804e-10	1.35731e-07
Cyp51	-2.53205	6.98762	38.5803	5.25459e-10	1.68231e-07
Cdkn1a	2.71719	4.27114	38.2541	6.21055e-10	1.95996e-07
Anxa5	1.52399	5.81864	37.8474	7.64985e-10	2.38018e-07
Slc13a2	-4.18342	0.96168	36.9481	1.21313e-09	3.72213e-07
Pdgfa	1.77138	3.72591	36.5874	1.45972e-09	4.41736e-07
Pls1	3.29914	1.37134	36.306	1.68641e-09	5.0344e-07
Vim	1.50161	4.16091	36.1924	1.7877e-09	5.2656e-07
Adamts7	-2.06315	3.85064	36.0799	1.89389e-09	5.46118e-07
Acot11	1.92587	5.31483	36.07	1.90354e-09	5.46118e-07
Gramd1b	2.20964	2.74763	35.3893	2.69959e-09	7.60108e-07
Gbp6	2.29639	3.46231	35.3759	2.71823e-09	7.60108e-07
Fdps	-1.78911	7.54296	34.6311	3.98494e-09	1.10039e-06
Ubd	6.13415	0.938286	34.3804	4.53255e-09	1.23616e-06
Ephb2	5.4037	1.76654	34.3368	4.6354e-09	1.24879e-06
Sprr1a	5.51167	0.391081	34.2635	4.81332e-09	1.2811e-06
Csad	-2.24911	8.32833	33.8984	5.8066e-09	1.52707e-06
Elovl6	1.44319	6.95378	33.6432	6.62074e-09	1.72069e-06
Lpar1	3.72169	1.45935	33.4562	7.28873e-09	1.87227e-06
Cdh13	2.53177	1.44289	33.1012	8.74833e-09	2.22137e-06
Pnpla5	6.65382	0.0196909	32.9272	9.56748e-09	2.40176e-06
Mvk	-1.69699	3.90169	32.8546	9.93166e-09	2.46517e-06
Cyp2b9	5.64966	1.66079	32.4428	1.22755e-08	3.01309e-06
Krt23	3.34854	1.43006	32.3311	1.30018e-08	3.1563e-06
C8b	-1.9174	8.00417	32.1697	1.41275e-08	3.3923e-06
Adgrf1	-4.45413	0.739137	31.3137	2.19527e-08	5.21459e-06
Tmie	1.92942	4.65943	31.2437	2.27588e-08	5.34857e-06
Avpr1a	-1.75545	4.14838	31.1369	2.40457e-08	5.59151e-06
Crybg2	4.24723	2.18077	30.8513	2.78582e-08	6.37472e-06
Saa1	1.94545	6.34384	30.842	2.79909e-08	6.37472e-06
Abcg5	1.96176	7.06222	30.4871	3.36102e-08	7.52551e-06
Scd1	2.31399	13.4764	30.4804	3.37253e-08	7.52551e-06
Hmgcs1	-1.75649	7.92253	30.1299	4.04061e-08	8.92611e-06
Pcsk9	-1.68374	5.52784	30.0592	4.19054e-08	9.16565e-06
Il1rn	3.18886	1.24675	29.9626	4.40453e-08	9.53925e-06
Tpst1	-1.2825	4.51998	29.8619	4.63937e-08	9.95033e-06
Lpl	1.99349	4.68523	29.6982	5.04807e-08	1.06646e-05
Smpd3	2.67059	3.02832	29.6902	5.06898e-08	1.06646e-05
1810055G02Rik	1.32686	5.06968	29.4097	5.85827e-08	1.21579e-05
Tubb2a	2.25447	7.62536	29.3997	5.88882e-08	1.21579e-05
Gbp3	1.89188	2.57775	28.878	7.7084e-08	1.57672e-05
Rdh16f2	-1.83004	4.58807	28.5212	9.26794e-08	1.87833e-05
Ces2a	-1.50703	8.26946	28.4154	9.78837e-08	1.96577e-05
Cyp26a1	-2.02905	4.19519	28.2509	1.06564e-07	2.12082e-05
Gm20721	6.94542	5.62239	28.1388	1.12922e-07	2.21099e-05
H2-Aa	2.23561	5.06047	28.1358	1.13097e-07	2.21099e-05
Irf6	-1.31333	5.37081	28.0012	1.21239e-07	2.33004e-05
Gm50241	5.92778	1.49296	28.0003	1.21296e-07	2.33004e-05
Ccl2	3.46187	0.454519	27.8584	1.30525e-07	2.48571e-05
Ly6a	1.88193	2.83666	27.783	1.35713e-07	2.56243e-05
Esr1	-1.56714	4.26035	27.6992	1.4172e-07	2.65316e-05
H2-Eb1	2.48563	4.92433	27.5423	1.53698e-07	2.85323e-05
Eda2r	3.01304	1.24229	27.4235	1.63431e-07	3.00864e-05
Hsd17b7	-1.47204	6.21209	27.4064	1.64888e-07	3.01036e-05
Nrg1	2.91483	1.05908	27.3289	1.71624e-07	3.10766e-05
Gpnmb	4.41285	1.23531	27.0415	1.99137e-07	3.57653e-05
Apoc2	1.4544	7.83155	26.861	2.18621e-07	3.8948e-05
Pgm3	1.21519	4.26534	26.8367	2.21396e-07	3.91269e-05
Zfp979	2.75005	2.24264	26.6967	2.38031e-07	4.17328e-05
Tbc1d31	1.44549	3.62296	26.5966	2.50685e-07	4.36053e-05
Mas1	6.07375	-0.404197	26.3815	2.80209e-07	4.836e-05
Cth	-1.41067	8.01868	26.2491	3.00102e-07	5.13918e-05
Tmsb4x	1.522	6.22037	26.1799	3.11043e-07	5.28094e-05
Depp1	1.53176	5.16034	26.1668	3.13161e-07	5.28094e-05
Lyve1	2.05475	2.48631	25.9766	3.45587e-07	5.7836e-05
Srebf2	-1.19527	5.60964	25.8259	3.73635e-07	6.20599e-05
Psmb9	1.70774	3.58386	25.7732	3.83986e-07	6.31525e-05
Ly86	2.28059	1.99372	25.7634	3.8593e-07	6.31525e-05
Gm10801	3.45663	0.846778	25.6688	4.0533e-07	6.58393e-05
Trim7	1.56565	4.42625	25.333	4.82374e-07	7.77819e-05
Klhl33	-3.61466	1.45645	25.1813	5.21867e-07	8.35403e-05
Tyrobp	1.80916	2.98832	24.8804	6.09981e-07	9.69431e-05
Mvd	-1.4441	4.30103	24.8634	6.15409e-07	9.71071e-05
Urad	-1.30196	4.02493	24.7681	6.46601e-07	0.000101305
Hal	-1.4122	7.7234	24.6836	6.75553e-07	0.000105096
Cyp7b1	-1.52666	8.2153	24.4378	7.6747e-07	0.000118561
Moxd1	-5.04504	3.30529	24.2832	8.31617e-07	0.000127578
Susd4	-1.36858	5.14215	24.1338	8.98701e-07	0.000136919
Adam11	2.21284	6.24339	23.8989	1.01531e-06	0.000153625
Arsg	1.42664	4.13487	23.8806	1.025e-06	0.000154036
Ifi44	2.20382	1.2951	23.6961	1.12813e-06	0.000168389
2200002D01Rik	1.83453	3.78006	23.6655	1.14617e-06	0.000169933
Lgals1	2.7734	4.70725	23.5706	1.20412e-06	0.000177334
Bcl2a1b	3.97812	0.182491	23.5499	1.21713e-06	0.000178063
Apom	-1.56352	6.48716	23.4152	1.30543e-06	0.000189725
Ifi27l2a	3.05793	1.2172	23.4018	1.31457e-06	0.000189806
Cxcl10	2.13688	1.99377	23.3018	1.38474e-06	0.000198638
H2-Ab1	2.15009	5.05381	23.2688	1.40864e-06	0.000200763
Slc17a2	-1.28855	7.47967	23.2097	1.45262e-06	0.000204531
Grm8	-2.46533	1.66982	23.2084	1.4536e-06	0.000204531
Gm49339	2.95697	0.798559	23.1468	1.50097e-06	0.00020986
Eif4ebp3	-1.54668	4.1171	23.0896	1.54621e-06	0.000214827
Aldoc	-2.43775	2.81382	23.0457	1.58192e-06	0.000218037
Gstp3	1.4854	3.46424	23.0371	1.58906e-06	0.000218037
Dsg2	-1.16562	6.27257	23.0199	1.60332e-06	0.000218636
Saa3	2.13666	2.35983	22.9385	1.67267e-06	0.000226693
Nfe2l2	1.38103	6.82429	22.9137	1.69444e-06	0.000228243
Orm2	1.48594	3.51965	22.7645	1.83121e-06	0.000245172
Lamb3	1.68265	2.4588	22.6274	1.9666e-06	0.000261712
Coro1a	1.93117	2.22669	22.5577	2.03931e-06	0.000269762
Tuba8	-4.31778	0.0469002	22.5236	2.07576e-06	0.00027295
Gstm2	1.31832	5.70606	22.4057	2.20722e-06	0.000288519
Myl12b	1.06924	5.40102	22.3588	2.26173e-06	0.000293905
Fam129b	1.36709	2.99094	22.3149	2.314e-06	0.000298939
Igf2bp2	2.04825	1.16986	22.2898	2.34444e-06	0.000301111
Mpped1	6.00012	-0.49292	22.1532	2.51736e-06	0.000321451
Capg	2.32391	1.53933	21.9405	2.81242e-06	0.000357065
Hcn3	1.89893	4.88852	21.9236	2.83729e-06	0.000358163
Foxa3	-1.11809	5.29819	21.8837	2.89688e-06	0.000363608
Fam222a	-2.59685	1.87268	21.8245	2.98763e-06	0.00037288
Lifr	-1.40671	7.93345	21.7841	3.05113e-06	0.000378666
Fam83a	3.28841	1.09698	21.7093	3.17243e-06	0.00039152
Amigo1	-1.4675	3.20695	21.5963	3.36499e-06	0.000412978
Gm10800	3.2249	3.02557	21.5695	3.41236e-06	0.000416478
S100a4	5.81026	-0.53786	21.5515	3.44461e-06	0.000418104
Ear2	2.48711	1.5675	21.4614	3.61031e-06	0.000435821
Aqp8	1.7439	6.86915	21.2959	3.93571e-06	0.000472521
Il7	4.37504	-0.442367	21.1644	4.21528e-06	0.000502029
Osbpl3	2.43636	3.37098	21.1591	4.22695e-06	0.000502029
BC035947	3.9481	-0.143782	21.0912	4.37929e-06	0.000517342
Lrrc28	0.985925	4.979	21.0544	4.46421e-06	0.000522796
Irf7	1.52828	4.51995	21.0507	4.47279e-06	0.000522796
Trem2	3.25435	0.168621	21.0326	4.51542e-06	0.000525001
Cd74	1.78626	6.26672	20.9779	4.64619e-06	0.000537377
Enc1	1.50994	2.8691	20.9355	4.74998e-06	0.000546519
S100a9	5.79631	-0.539686	20.7812	5.14847e-06	0.0005893
Tm6sf1	2.03983	1.87554	20.6262	5.58283e-06	0.000635723
Tk1	-1.40886	4.29912	20.4682	6.06313e-06	0.000686875
Cyp3a59	-1.30883	5.90779	20.3851	6.33224e-06	0.000713011
Igfbp3	1.17032	4.74036	20.3772	6.35839e-06	0.000713011
Mpv17l	-1.20533	4.76114	20.291	6.65131e-06	0.000742092
Abhd8	-1.7452	2.27153	20.2785	6.6948e-06	0.00074319
Cd52	2.10301	2.02141	20.2386	6.83586e-06	0.000755055
Orm3	1.89288	2.94275	20.1998	6.97617e-06	0.000766719
Afmid	-1.06262	6.60104	20.166	7.10033e-06	0.000776502
Mfsd2a	1.71987	6.36731	20.125	7.25427e-06	0.000789429
Oas1a	2.31805	1.66197	20.0721	7.45752e-06	0.000807569
Ppat	-1.07153	4.70174	19.9346	8.01384e-06	0.000863579
Sox4	2.00393	1.3654	19.857	8.34586e-06	0.000894992
Cotl1	1.19629	3.71567	19.8253	8.48515e-06	0.000905534
Tagln2	1.18659	3.39803	19.7991	8.6025e-06	0.000913644
Spp1	1.41821	4.94578	19.7632	8.76557e-06	0.000926508
Ccdc80	1.3305	3.01937	19.7416	8.86492e-06	0.000932548
Ifit3	1.37436	2.96795	19.6954	9.08199e-06	0.000950854
H2-Q4	1.17059	4.76832	19.6842	9.13536e-06	0.000951931
Mybl1	2.39353	1.24505	19.5777	9.65884e-06	0.00100175
Plac8	1.69035	1.95548	19.5315	9.89522e-06	0.00101748
Hexb	1.48943	3.3242	19.5301	9.90256e-06	0.00101748
Rufy4	2.67668	0.988612	19.5156	9.9781e-06	0.00101948
Wnk4	-2.10853	1.31805	19.5087	1.00143e-05	0.00101948
Oasl2	2.18047	2.24121	19.4826	1.01519e-05	0.00102874
Hist1h2ap	2.05379	2.0816	19.4725	1.02056e-05	0.00102946
Ccr2	2.22363	1.48218	19.4403	1.03791e-05	0.00103614
Sh3bgrl3	1.71343	2.28652	19.4345	1.04112e-05	0.00103614
Exoc4	1.03688	4.37664	19.4342	1.04125e-05	0.00103614
Tmem43	1.04881	3.80272	19.3864	1.06767e-05	0.00105766
Tmem86a	1.82401	2.74867	19.3371	1.09554e-05	0.00108043
Gbp7	1.36032	3.97061	19.3237	1.1033e-05	0.00108158
Dhcr7	-1.08334	6.20967	19.3181	1.1065e-05	0.00108158
Cntnap1	2.20598	1.94999	19.2136	1.16879e-05	0.00113744
Epb41l5	-1.06411	5.31442	19.1983	1.17818e-05	0.00114154
Nnt	1.16932	4.87512	19.1048	1.23736e-05	0.00119365
Cd36	1.84176	6.48218	18.9776	1.32262e-05	0.00127035
Sema5b	2.29518	3.3332	18.8853	1.38815e-05	0.00132751
Thrsp	1.43829	9.75494	18.8536	1.41144e-05	0.00134397
Cyp2b10	-2.18274	2.78914	18.8296	1.42933e-05	0.00135041
Cphx3	4.12651	-0.104892	18.8281	1.43042e-05	0.00135041
Gbp10	1.74533	2.84572	18.7863	1.46216e-05	0.00137209
Cd40	5.4007	-0.789824	18.7815	1.46581e-05	0.00137209
Ddias	2.50289	0.398852	18.7615	1.48126e-05	0.00138069
Epop	-2.38164	1.56755	18.687	1.54032e-05	0.00142627
Dntt	2.86895	0.51516	18.6836	1.54307e-05	0.00142627
Sod3	1.01973	4.90856	18.6499	1.57055e-05	0.00144563
Tspan33	-1.30796	3.3267	18.6245	1.59164e-05	0.00145896
Mgmt	1.39872	4.10698	18.5959	1.61571e-05	0.0014749
Cadm4	-1.37283	3.27233	18.5499	1.65516e-05	0.00150469
Hcls1	1.35827	2.98229	18.4376	1.75556e-05	0.00158943
Abtb2	-1.24267	3.87349	18.4135	1.7779e-05	0.00160309
Sptlc3	6.33978	-0.0731877	18.3954	1.79489e-05	0.00161182
Slc35f2	3.92419	0.202275	18.3109	1.8763e-05	0.00167811
Ehd4	1.44241	2.64524	18.2829	1.90404e-05	0.00169606
Ly9	2.13528	0.834386	18.2171	1.97101e-05	0.00174866
C2	-0.977356	6.11333	18.2026	1.98604e-05	0.00175494
Zfp217	-1.15921	3.55333	18.1335	2.05945e-05	0.00181256
Sec14l4	-1.09733	6.87364	18.0897	2.10736e-05	0.00184675
Cebpe	2.41483	2.50736	18.0828	2.11502e-05	0.00184675
Stk39	1.52628	2.70114	18.0206	2.18524e-05	0.00189567
Col5a3	1.57134	5.88694	18.018	2.18821e-05	0.00189567
Mapre2	-1.2162	4.12566	18.0041	2.20428e-05	0.00190214
Defb1	4.16023	0.36652	17.9639	2.25139e-05	0.00193523
Dop1b	-1.06556	5.68749	17.9239	2.29915e-05	0.00196862
Axl	1.16248	4.01216	17.7609	2.50473e-05	0.00213023
Nuggc	-4.54376	0.218404	17.7591	2.50718e-05	0.00213023
Lsp1	1.73249	1.53538	17.7253	2.55213e-05	0.00216012
Gcat	-1.11312	5.64272	17.6886	2.60177e-05	0.00218572
Iqcg	1.97229	1.82664	17.6883	2.60216e-05	0.00218572
Gngt2	1.7453	2.53493	17.6787	2.61535e-05	0.00218848
Tacc1	-0.927742	5.51309	17.6233	2.69269e-05	0.00224469
Sash3	2.19343	0.623652	17.5999	2.72599e-05	0.0022639
Serpina3g	1.61052	2.4169	17.5638	2.77822e-05	0.00229859
Otulinl	1.87874	1.13849	17.5555	2.79045e-05	0.00229859
Grip1	5.24308	-0.882715	17.5486	2.80064e-05	0.00229859
Plek	1.68935	1.70572	17.5426	2.80937e-05	0.00229859
Cisd3	1.30412	5.43193	17.5112	2.85625e-05	0.00232832
Cdcp1	3.32842	2.40974	17.4922	2.88495e-05	0.00234307
Adck5	-1.14933	4.18749	17.376	3.06673e-05	0.00248158
Cyba	1.56196	2.46513	17.3397	3.12593e-05	0.00252025
Gm8113	2.81755	0.0377019	17.2821	3.22207e-05	0.00258831
Tbc1d30	-1.52245	2.32711	17.2578	3.2635e-05	0.00260577
Gm38394	-1.32837	5.76089	17.2556	3.26738e-05	0.00260577
Fkbp5	-1.13566	4.33553	17.2416	3.29154e-05	0.00261559
Lst1	2.5093	0.49662	17.2266	3.31764e-05	0.00262688
1810058I24Rik	0.943429	6.06819	17.1711	3.416e-05	0.0026951
Gcnt4	-2.13897	2.41949	17.0504	3.63998e-05	0.00286159
Fbxo31	-0.985462	5.09637	17.0332	3.67311e-05	0.0028774
Rgs1	2.10067	0.937402	17.022	3.695e-05	0.00288432
Irs2	-1.83049	3.68042	17.0118	3.71485e-05	0.00288923
Tkfc	1.18559	8.97131	17.0054	3.72745e-05	0.00288923
Evi2b	1.6518	1.47091	16.9749	3.78767e-05	0.0029209
Fmn1	-1.43844	2.85717	16.9714	3.79475e-05	0.0029209
Tmx4	-1.11625	4.32768	16.9536	3.83051e-05	0.00293819
Tmem71	2.13049	0.82277	16.9316	3.87504e-05	0.00296206
Scara5	-1.62244	3.40509	16.8888	3.96353e-05	0.00301925
Lrp2bp	-2.91051	0.732687	16.8798	3.98236e-05	0.00302317
Insig1	-1.32702	8.67941	16.8389	4.06908e-05	0.00307842
Inhbe	0.888565	6.12731	16.7963	4.1614e-05	0.00313753
Sco2	1.16311	5.51104	16.7771	4.20383e-05	0.00315873
Serpine1	2.14638	1.04708	16.726	4.31841e-05	0.00323104
Apoa4	2.62671	10.9221	16.7213	4.32931e-05	0.00323104
Fbxo21	-1.16987	5.40139	16.6844	4.41418e-05	0.00328329
Cd63	1.48749	2.25391	16.6775	4.43022e-05	0.003284
Tagln	1.5013	2.35997	16.6709	4.44584e-05	0.003284
Cyp2d40	1.01906	5.92344	16.665	4.45973e-05	0.003284
Acod1	5.06645	-0.981769	16.6134	4.58272e-05	0.00336335
Slc22a27	2.15978	0.846831	16.5571	4.72073e-05	0.00345316
Sort1	-1.41203	4.33607	16.5148	4.82717e-05	0.00351937
Stard4	-1.30732	6.47613	16.4299	5.0483e-05	0.00366849
Csf2ra	1.55104	2.87443	16.3876	5.16215e-05	0.00373892
Klf6	1.23583	3.6761	16.3759	5.19406e-05	0.00374974
Themis2	1.54317	1.93801	16.3305	5.32013e-05	0.00382824
Ifi207	1.63003	2.37446	16.2573	5.52966e-05	0.00396609
Pnldc1	2.46135	1.17387	16.2265	5.62014e-05	0.00401794
Cyp3a11	-1.53202	12.5398	16.1939	5.71778e-05	0.00407456
Sirpa	1.07636	3.95187	16.161	5.81793e-05	0.0041326
Spi1	1.78839	2.32708	16.0188	6.27182e-05	0.00441736
Fcgr1	2.00347	1.16791	16.0175	6.2759e-05	0.00441736
Gria3	3.17543	2.00552	16.0166	6.2788e-05	0.00441736
Cnnm1	3.91061	-0.721759	16.0051	6.31713e-05	0.00443022
Ephb4	-0.956478	4.53255	15.8559	6.83546e-05	0.00477855
Ucp2	1.08224	4.36126	15.8018	7.03352e-05	0.0049015
Evl	1.74175	2.06292	15.7909	7.07429e-05	0.00491441
9130409I23Rik	1.09487	4.71141	15.783	7.1039e-05	0.00491951
Isg15	1.68956	2.4702	15.7566	7.20364e-05	0.00497299
Cfd	4.5039	4.57641	15.7299	7.30588e-05	0.00502786
Pnp	-1.13859	5.736	15.7192	7.34732e-05	0.00504067
Abcg1	1.26777	2.97078	15.679	7.5054e-05	0.00513318
Ccng1	0.917633	5.57643	15.6432	7.64859e-05	0.00521497
Cntrl	1.11423	5.08162	15.5741	7.93336e-05	0.00539249
Map3k2	-0.983891	4.94512	15.5296	8.12238e-05	0.00550403
Immp2l	1.03346	4.62752	15.4861	8.31126e-05	0.00560588
Gale	1.0122	4.87596	15.4834	8.32343e-05	0.00560588
Basp1	1.8283	1.05667	15.4547	8.45071e-05	0.0056743
Pdxk	-0.984916	5.67627	15.4205	8.60499e-05	0.00576039
Phlda3	3.37589	1.0763	15.3635	8.86868e-05	0.00591897
Ms4a6b	1.91126	0.81743	15.3292	9.03097e-05	0.00600913
H2-DMa	1.8899	1.86285	15.2848	9.24565e-05	0.00613351
Tmem63a	-1.0226	3.58476	15.2438	9.44872e-05	0.00624689
Chil3	4.926	-1.04205	15.2389	9.47312e-05	0.00624689
Phf11b	2.58665	-0.0116618	15.2276	9.52999e-05	0.0062556
Mycn	1.79435	1.43595	15.225	9.54296e-05	0.0062556
Aldh3a2	1.31461	9.11531	15.1744	9.80236e-05	0.00640663
Apbb1ip	1.75935	1.2224	15.0824	0.000102918	0.00670669
Bag2	-1.93336	1.34912	15.0627	0.000103998	0.00675709
Tubb2b	5.73567	-0.619827	15.0361	0.000105473	0.00683286
Msrb2	1.03854	3.54159	15.0156	0.000106627	0.00688744
Fam234b	-1.26564	4.26794	15.0003	0.000107492	0.00692303
Zbed5	1.71764	1.98027	14.9024	0.000113216	0.00727051
Ifi211	2.5962	0.0821716	14.8287	0.000117731	0.00753854
Itga4	1.23429	2.76266	14.7413	0.000123317	0.0078734
Igfbp2	-1.13393	7.63803	14.7231	0.000124513	0.00792686
Lrrc58	-1.11453	6.70756	14.7139	0.000125123	0.00794279
Atxn1	-1.31818	4.83662	14.6861	0.00012698	0.00803756
H2-DMb1	2.20537	1.84656	14.6622	0.000128596	0.00811664
Rbis	1.06333	4.37748	14.6369	0.000130336	0.00820303
Lgr4	-0.869645	5.63286	14.6204	0.000131483	0.00825168
Ptpn3	-0.922798	5.14972	14.6048	0.000132574	0.00829656
Col6a1	1.24109	2.75032	14.5857	0.000133926	0.00835749
Serpinh1	0.980309	3.50882	14.5769	0.000134556	0.00837318
Zmat1	1.31164	2.90643	14.5624	0.000135591	0.00841386
Cyp39a1	-2.31251	3.28598	14.5336	0.000137681	0.00851966
Tfrc	-1.00572	4.99352	14.5266	0.000138193	0.00852744
Pacrg	5.22829	-0.84845	14.5143	0.000139099	0.00855943
mt-Nd6	1.63389	10.7854	14.5062	0.000139697	0.00857234
Ifit3b	1.88427	0.945059	14.4934	0.000140649	0.00860686
Cyp2b13	3.20277	0.160066	14.4295	0.000145502	0.00887925
Aox3	-1.29761	9.57093	14.4217	0.000146111	0.00889182
Camkk2	-1.14856	3.34053	14.3862	0.00014889	0.00903609
Asns	-2.28608	3.73442	14.3562	0.000151279	0.0091559
Arhgap25	1.63052	1.18915	14.344	0.000152263	0.00919027
Als2	-0.910253	6.6749	14.3274	0.000153615	0.00924659
Slc2a8	-1.04405	3.35744	14.2914	0.000156579	0.00939943
Tbxas1	1.86702	0.781987	14.2672	0.000158609	0.00949546
Akr1c19	-1.50233	5.92708	14.2589	0.000159309	0.00951158
Ccdc107	1.22807	5.63317	14.251	0.000159977	0.00952573
Npdc1	1.36081	2.02023	14.2261	0.000162107	0.00962664
Adam33	2.57247	0.291745	14.208	0.000163677	0.00969383
Slfn2	1.68786	1.67433	14.1992	0.000164437	0.0097128
Rad51b	2.47492	2.69911	14.1862	0.000165581	0.00975427
Cyth4	1.33586	2.8425	14.1512	0.000168687	0.00991079
Acmsd	-1.04583	4.14804	14.1086	0.000172555	0.0100839
Ifit1	1.66074	2.77238	14.1038	0.000172995	0.0100839
Zbtb7c	-1.74965	1.82216	14.1037	0.000173002	0.0100839
Siglech	3.32401	-0.0784394	14.0826	0.000174954	0.0101708
Rad9b	1.93353	2.36363	14.0692	0.000176209	0.0102169
Ccl21a	2.36071	0.535991	14.0567	0.000177381	0.0102579
Stk10	1.46828	2.20482	14.0258	0.000180318	0.0104005
Fkbp2	0.943503	5.96142	13.9867	0.000184104	0.0105832
Acot2	1.57827	2.63914	13.9714	0.000185612	0.0106227
Bex4	4.05641	-0.418457	13.9497	0.000187772	0.0107093
Zfand4	-0.866937	4.59998	13.8878	0.000194058	0.0110067
Elovl5	1.42827	9.27518	13.8853	0.000194315	0.0110067
Tcaim	-0.828053	4.73065	13.8662	0.0001963	0.011085
Serpina1e	-3.04224	12.1481	13.8623	0.000196702	0.011085
Cav1	2.45859	2.76439	13.8574	0.00019722	0.011086
Irs1	-1.24111	4.39461	13.8432	0.000198717	0.0111418
Zkscan1	-0.92878	5.14311	13.8067	0.000202608	0.0113312
Plin4	1.86248	4.58188	13.7651	0.000207153	0.0115561
9130401M01Rik	0.981732	3.62237	13.7479	0.000209054	0.0116328
Ccdc85c	-0.998859	4.25504	13.6871	0.000215933	0.0119854
Cry1	-1.10255	4.23133	13.6257	0.000223105	0.0123524
Ngp	5.18379	-0.85446	13.6192	0.000223886	0.0123647
Fbxo40	1.91137	1.17992	13.6065	0.000225403	0.0124174
Spon2	1.84049	2.50501	13.5575	0.000231369	0.0127144
Gm765	2.71776	-0.198166	13.5331	0.000234397	0.0128488
Capn10	-0.898203	4.04289	13.5189	0.000236173	0.0129141
Por	-1.07887	7.69539	13.5087	0.000237454	0.0129416
Lilrb4a	1.56026	3.58	13.5051	0.000237914	0.0129416
Capns1	0.825113	6.70518	13.501	0.000238433	0.0129416
Zfp395	-1.02022	4.78701	13.4624	0.00024339	0.0131782
Cyp21a1	2.34051	2.07432	13.4238	0.000248455	0.0133937
Igfals	-0.90875	6.25048	13.4228	0.000248582	0.0133937
Uck2	-0.984789	3.32126	13.4127	0.00024992	0.0134331
Abcg8	1.03776	6.79222	13.3953	0.000252256	0.0134992
Inhbb	2.4383	0.233366	13.3944	0.000252373	0.0134992
Aldob	1.18483	12.0544	13.3341	0.000260625	0.0138956
Marcks	1.00057	4.19776	13.3268	0.000261641	0.0138956
Antxr2	-0.995906	4.80105	13.3265	0.000261686	0.0138956
Egr2	3.33214	-0.566697	13.3221	0.0002623	0.0138956
Pld4	1.31416	2.98166	13.3033	0.000264935	0.0140016
Lect2	0.865645	6.66016	13.2959	0.000265989	0.0140238
Pklr	1.04301	8.33349	13.2574	0.000271507	0.0142806
Wfdc2	2.44387	2.79752	13.2237	0.000276429	0.014505
Psmb8	1.13163	4.05916	13.2042	0.000279316	0.0146217
Myo1f	1.93484	1.70151	13.1811	0.000282789	0.0147275
Eva1b	1.31679	2.03729	13.1742	0.000283832	0.0147275
Tmprss2	-1.70028	2.46316	13.1708	0.000284346	0.0147275
Bloc1s1	1.14796	5.26373	13.1665	0.000284995	0.0147275
Glipr1	2.64071	-0.16441	13.165	0.000285224	0.0147275
Susd3	4.65102	-1.16156	13.1643	0.000285336	0.0147275
Arhgef40	-0.990136	3.72588	13.1585	0.000286225	0.014732
Yy2	2.83014	-0.154378	13.1504	0.000287464	0.014732
Dusp8	1.49254	2.16002	13.1488	0.000287702	0.014732
Fyb	1.30702	3.33765	13.1463	0.000288092	0.014732
Bhmt	1.14797	11.0933	13.1183	0.000292422	0.0148503
Sh3pxd2b	1.745	0.914192	13.1159	0.000292802	0.0148503
Abcb10	-0.821513	5.36489	13.1072	0.00029417	0.0148503
Ifi203	1.10443	4.17901	13.1064	0.000294285	0.0148503
Tbc1d2	-2.29295	0.67178	13.1034	0.000294764	0.0148503
Kcnn2	-0.864149	4.50475	13.1012	0.000295111	0.0148503
Fxyd5	1.34222	2.07297	13.0815	0.000298229	0.0149731
Csrnp1	-1.30324	3.15515	13.0438	0.00030429	0.0152428
Copz2	0.897188	3.85323	13.0287	0.000306753	0.0153254
Tmem45b	3.49791	-0.574004	13.0252	0.000307326	0.0153254
Srxn1	0.790518	5.29163	13.0065	0.000310412	0.0154398
Smad9	-1.67764	3.46598	13.0026	0.000311057	0.0154398
Gpd2	0.818578	5.91828	12.9951	0.000312301	0.0154398
Ly6k	4.86837	-1.04928	12.9945	0.000312415	0.0154398
Ms4a6c	1.97057	1.55664	12.9889	0.000313337	0.0154507
Ttc32	1.05235	3.74062	12.9666	0.000317101	0.0155825
Cabp4	3.19561	-0.667462	12.9622	0.000317843	0.0155825
Ttbk1	1.71058	2.25043	12.9605	0.000318126	0.0155825
Cenph	3.69576	-0.861614	12.9485	0.000320176	0.0156483
Ptges	2.38223	1.15189	12.9418	0.000321327	0.0156699
Vmn1r90	-1.58408	2.22292	12.904	0.00032788	0.0159542
Col5a2	1.45434	1.69137	12.8881	0.000330676	0.0160549
Epsti1	1.80575	1.00934	12.8711	0.000333691	0.0161341
Ulk4	3.81981	0.226212	12.8707	0.000333768	0.0161341
Ddx60	1.53205	2.02532	12.8633	0.000335094	0.0161628
Uqcc2	1.16153	4.20814	12.8476	0.000337915	0.0162316
Spink5	2.55034	0.278543	12.8472	0.000337989	0.0162316
Rasa4	1.71529	1.77851	12.8409	0.000339131	0.0162358
Mapre3	0.889629	5.47182	12.8386	0.000339547	0.0162358
Cyp2c40	-2.51351	1.29851	12.8109	0.000344599	0.0164418
Epg5	-0.832932	4.78798	12.8014	0.000346364	0.0164904
Acer2	0.887191	3.4595	12.773	0.000351668	0.0166949
Fbxo6	0.896932	4.21806	12.7629	0.000353561	0.0166949
Slc43a1	-1.83577	2.1413	12.7625	0.000353646	0.0166949
Erg28	-0.894787	5.25253	12.7623	0.000353683	0.0166949
Limk1	1.42252	2.53682	12.7415	0.000357624	0.0168449
Gcnt1	2.35544	0.17377	12.7285	0.000360126	0.0169267
Gstm3	0.817211	6.21621	12.7015	0.000365356	0.0171361
Foxq1	-1.30259	3.61372	12.6906	0.000367503	0.0172002
Gls2	-0.989536	7.7504	12.6819	0.000369207	0.0172435
Mgll	1.04601	8.17602	12.6659	0.000372377	0.0173548
Ly6c2	2.73671	-0.420593	12.6552	0.000374525	0.0174181
Xlr3a	1.61108	3.47115	12.6486	0.000375845	0.0174377
Cgref1	1.90283	1.22079	12.6415	0.000377279	0.0174377
Gpr65	1.79046	0.97562	12.6413	0.000377314	0.0174377
Dhfr	0.753171	5.18557	12.6141	0.000382848	0.0176454
Extl1	0.894308	4.12457	12.6114	0.000383404	0.0176454
Ctss	1.41323	4.58803	12.594	0.000386995	0.0177727
Cx3cr1	1.9659	0.533873	12.5902	0.00038778	0.0177727
Mndal	1.16519	3.39559	12.5791	0.000390079	0.0178411
Cebpd	1.20034	3.36768	12.5553	0.000395083	0.0180326
Clock	-0.813255	5.69714	12.5164	0.000403395	0.018374
Enpp1	-0.957472	4.50389	12.5115	0.000404446	0.018384
Dclk3	-1.2555	3.05344	12.4912	0.00040888	0.0185474
Fitm1	1.45215	5.70671	12.4605	0.000415647	0.0188157
Hspa1a	-1.20016	3.70955	12.4465	0.000418768	0.0189182
Adcy1	5.13992	-1.01194	12.4253	0.000423553	0.0190953
Peli3	-1.94839	0.841358	12.3881	0.000432089	0.0194405
Prr16	-0.758432	5.46137	12.3827	0.000433321	0.0194563
Mppe1	1.04411	3.22024	12.3704	0.000436203	0.0195293
Filip1l	1.26364	3.12107	12.3682	0.000436715	0.0195293
Plgrkt	1.566	2.39069	12.3637	0.000437765	0.0195367
Ahctf1	-0.803859	6.12015	12.3368	0.00044412	0.019762
H2ac19	1.39711	5.01474	12.3348	0.000444603	0.019762
Zfp423	2.93173	-0.209758	12.3251	0.000446912	0.0198248
Ly6e	1.06373	6.8515	12.3194	0.000448271	0.019832
Gbp4	1.4274	2.17054	12.3169	0.000448871	0.019832
Slc6a6	-0.848741	6.27411	12.2896	0.000455488	0.0200735
Gbp8	1.71251	2.00666	12.2839	0.000456874	0.0200735
Ppp2r5e	-0.839735	5.86825	12.2832	0.000457063	0.0200735
Olfm3	1.22015	2.85397	12.2688	0.000460607	0.020189
Krt18	0.834249	7.12764	12.2568	0.000463573	0.0202788
Ccl3	4.53574	-1.2156	12.2503	0.000465184	0.020309
Eln	1.57403	1.43137	12.2394	0.000467898	0.0203873
Vnn1	1.99591	5.29803	12.2321	0.000469741	0.0204255
Ciita	1.70607	1.62805	12.2276	0.000470867	0.0204255
Lcor	-1.34349	3.22215	12.2249	0.000471549	0.0204255
Sting1	1.63799	0.840691	12.1937	0.000479501	0.0207293
Tatdn2	-0.829248	4.62079	12.1893	0.000480639	0.0207379
Ttc23	0.750869	5.47379	12.1825	0.000482404	0.0207735
Slc15a2	-3.04247	1.69825	12.1682	0.000486106	0.0208685
Btc	1.6201	1.58667	12.1667	0.0004865	0.0208685
Ces1d	-1.32964	9.2812	12.1339	0.000495125	0.0211973
Obp2a	2.1069	3.43286	12.1287	0.000496505	0.0212153
Clec12a	1.91052	2.04923	12.1214	0.000498474	0.0212583
Tob1	-0.911585	7.23518	12.1176	0.000499471	0.0212597
Pnp2	-2.09032	0.431717	12.1131	0.000500699	0.0212711
AI661453	-0.819325	4.73754	12.1081	0.000502026	0.0212865
Clec9a	1.48971	1.39003	12.1005	0.000504096	0.0213333
Rps6kl1	1.54915	1.06022	12.0885	0.000507332	0.0214292
Oas3	2.08791	0.406596	12.0701	0.000512377	0.021601
Akr1c14	-1.07655	8.78785	12.0487	0.000518284	0.0218084
Kcnc3	-1.24556	3.42064	12.0417	0.000520238	0.021849
Trim34b	3.1212	-0.267138	12.0203	0.000526237	0.022059
Ctsc	-1.03728	5.69514	12.0074	0.00052991	0.0221709
Slfn4	3.33998	0.471777	12.0024	0.000531318	0.0221878
Galnt3	3.0316	-0.460771	11.9973	0.000532785	0.0222071
Mrps28	0.917191	4.25424	11.9926	0.00053411	0.0222204
Kantr	-1.84664	0.910675	11.9741	0.000539461	0.0223603
Smc4	0.943565	4.03418	11.9739	0.000539498	0.0223603
Sp110	1.39818	1.72128	11.9528	0.000545643	0.0225496
Tmem140	0.823738	4.25866	11.9513	0.000546107	0.0225496
Olfml3	1.48306	1.43384	11.941	0.000549111	0.0226314
Abi3	1.44275	2.42071	11.9337	0.000551274	0.0226782
Slc15a3	1.34989	2.44507	11.9267	0.000553338	0.0227208
Ccdc34	1.70621	1.0394	11.9157	0.000556621	0.0227946
Plscr2	0.823292	4.53223	11.9138	0.000557199	0.0227946
Wdr81	-0.837307	5.05278	11.8459	0.000577884	0.0235971
Snx29	-1.31756	2.13706	11.8275	0.000583625	0.0237876
Nat8f3	1.87106	1.1128	11.8118	0.000588577	0.0239452
Gm14327	-0.970942	3.56982	11.8011	0.000591962	0.0240387
St3gal6	-1.54385	1.66553	11.7771	0.000599632	0.0243055
Msl3l2	2.00555	0.274777	11.769	0.000602247	0.0243667
Gm49342	-1.98134	4.2231	11.7582	0.000605751	0.0244242
Hnmt	0.970196	4.65356	11.7573	0.000606058	0.0244242
Ttc39a	1.4481	3.01172	11.7544	0.000606985	0.0244242
Tat	-1.18785	10.4437	11.7476	0.000609211	0.0244692
C1qa	1.28738	4.74392	11.6855	0.000629881	0.0252383
Ttc25	3.00837	-0.0058402	11.6827	0.000630843	0.0252383
Tpgs1	0.853929	4.11046	11.6773	0.000632674	0.0252383
Maoa	-1.12071	3.43002	11.6765	0.000632929	0.0252383
Tmem223	0.83001	4.18745	11.639	0.000645825	0.0256605
Timp1	3.78716	-0.756829	11.639	0.000645839	0.0256605
Agxt	-0.849216	6.7333	11.619	0.000652815	0.0258911
Dennd11	-1.00776	3.52551	11.6074	0.000656897	0.0259493
Csf2rb	1.13953	2.76074	11.6054	0.00065759	0.0259493
Spatc1l	-4.84141	-0.863052	11.6017	0.000658919	0.0259493
Zfp992	1.47322	2.80822	11.6015	0.00065898	0.0259493
Vps13c	-1.13751	5.29446	11.5974	0.00066045	0.0259608
Cpeb4	-0.82472	5.71589	11.5806	0.000666436	0.0261496
Lrtm1	2.57524	3.33833	11.5587	0.000674346	0.0264131
Tm4sf20	5.07357	-0.902854	11.5406	0.000680942	0.0266242
Brd9	1.06883	3.73233	11.5288	0.000685259	0.0267241
Itgax	2.04835	0.908063	11.5248	0.000686725	0.0267241
Notch2	-0.879113	5.45152	11.5154	0.000690217	0.0267241
Ren1	4.29801	-0.104923	11.5138	0.000690812	0.0267241
Sema4d	1.96734	0.57603	11.5133	0.000690987	0.0267241
Zfp532	1.5557	1.80203	11.502	0.00069521	0.0268026
Klhl31	3.53485	0.30364	11.4951	0.000697816	0.0268562
Iqgap1	0.921851	3.51438	11.4716	0.000706683	0.0271267
Srgn	0.91958	3.04961	11.47	0.000707302	0.0271267
Ckb	1.36797	2.21273	11.4606	0.000710863	0.0272013
Calhm6	2.02764	0.471349	11.4584	0.000711709	0.0272013
Them7	0.819612	4.73323	11.4543	0.000713274	0.027214
Krcc1	0.782825	5.91819	11.4181	0.000727305	0.0277015
Sptbn2	-0.951713	6.05626	11.3875	0.000739387	0.0281133
Cdk11b	0.896703	5.62612	11.3715	0.000745777	0.0283075
Mup8	-1.16669	7.01083	11.3678	0.000747273	0.0283089
Rap2a	-0.944006	4.9248	11.3651	0.000748376	0.0283089
Cd300lb	1.83225	0.817551	11.3578	0.000751322	0.0283717
Epb41l4b	-0.809867	6.29736	11.3477	0.000755422	0.0284779
Tnip3	4.51041	-1.22107	11.3297	0.000762755	0.0287053
Cldn6	4.59628	-1.16793	11.3212	0.000766283	0.0287891
Cmtm3	1.15756	2.32726	11.3085	0.000771529	0.0289369
Fzd7	-0.775072	4.54987	11.2893	0.000779546	0.0291881
Slc3a1	-1.31264	5.45741	11.2785	0.000784106	0.0292809
Nr4a2	2.63136	-0.445704	11.2771	0.000784676	0.0292809
Hacl1	-1.37771	7.69915	11.2698	0.000787791	0.0293475
Bmerb1	4.72308	-1.14974	11.2624	0.000790946	0.0294155
Prkaa2	-0.924066	6.37684	11.2477	0.000797219	0.0295989
Keg1	-1.32162	7.53245	11.2405	0.000800309	0.0296306
Cxcl12	-0.95327	7.9743	11.2375	0.000801595	0.0296306
Anapc13	1.02725	5.3045	11.2364	0.000802097	0.0296306
C1qb	1.21053	4.66958	11.2208	0.000808868	0.0298131
Ahcyl2	-0.812152	4.70624	11.2188	0.000809734	0.0298131
Eef2k	-0.903604	3.40752	11.2077	0.000814569	0.0299412
Bcl2a1a	2.46581	-0.0608654	11.1492	0.000840684	0.0308498
Slc22a7	1.36476	4.67493	11.1369	0.000846282	0.0309272
Hsd3b5	-1.14778	6.97912	11.1355	0.000846898	0.0309272
Mmab	-0.953592	4.6038	11.1353	0.000846994	0.0309272
Crybg3	-0.888696	4.03822	11.1309	0.000849007	0.0309495
Tctn2	-1.80141	0.687341	11.1229	0.000852684	0.0310324
AI413582	1.67014	0.940226	11.1126	0.000857439	0.0310813
Gdf3	3.04624	-0.387242	11.1114	0.000857986	0.0310813
Amer2	-2.82049	-0.0595076	11.1108	0.00085825	0.0310813
Cps1	-1.4068	11.3728	11.0979	0.000864272	0.0312158
9930111J21Rik2	1.22174	2.90845	11.0968	0.00086479	0.0312158
Cox20	1.08978	4.25699	11.0879	0.000868909	0.0313133
Chad	-1.58551	1.37087	11.0782	0.000873474	0.0314266
Pcdh1	-0.842977	6.20942	11.0713	0.00087673	0.0314924
mt-Atp6	1.53073	11.7972	11.0564	0.000883824	0.0316957
Czib	0.935772	4.34331	11.0468	0.000888392	0.0317544
Myof	1.2643	1.84728	11.0443	0.000889605	0.0317544
Scap	-0.835275	6.58874	11.0434	0.000890053	0.0317544
Xaf1	1.57676	3.13514	11.041	0.000891211	0.0317544
Dmpk	1.28243	4.75055	11.0353	0.00089394	0.0317563
Creb3l1	2.18602	0.153482	11.0349	0.000894139	0.0317563
Grin3b	2.9246	-0.708058	11.0236	0.000899571	0.0318979
Trim12c	1.04457	3.6157	11.015	0.00090379	0.0319962
Cd44	1.43092	2.80763	11.005	0.000908683	0.0320758
Nrp1	-0.738417	5.84528	11.003	0.000909652	0.0320758
Spp2	0.740447	5.86605	11.0015	0.000910394	0.0320758
Bcl2	1.68577	0.982635	10.9831	0.000919467	0.0323425
Fras1	-1.70644	1.92536	10.9788	0.000921587	0.0323425
Ttc39b	-0.880688	5.02358	10.9773	0.000922356	0.0323425
Fam221b	1.35051	2.74656	10.9668	0.000927612	0.0324752
Tppp	-0.933045	3.77553	10.9524	0.000934831	0.0326762
Cyp2c70	-1.04911	9.03228	10.9168	0.000952951	0.0332569
Sult1e1	4.33195	2.77497	10.8932	0.000965181	0.0335811
Ppbp	2.31312	-0.106528	10.893	0.000965281	0.0335811
Pnpla7	0.783172	6.61893	10.8793	0.000972432	0.0337628
Cystm1	-1.25258	2.50862	10.8772	0.000973559	0.0337628
Micos10	0.935418	5.24706	10.8691	0.00097783	0.0338577
H2-Q6	0.995591	4.71346	10.8573	0.00098406	0.0340201
Lonrf1	-0.990399	3.06502	10.8511	0.000987372	0.0340813
Mfap4	1.79711	0.706827	10.8317	0.000997792	0.0342483
Gm45837	-7.23716	0.737741	10.8315	0.000997867	0.0342483
Ssc5d	2.77521	-0.581755	10.8266	0.00100054	0.0342483
Ifit2	1.28371	1.76517	10.8265	0.00100055	0.0342483
Ccdc152	1.80068	2.69793	10.8258	0.00100096	0.0342483
Bri3	0.828676	5.36864	10.8248	0.00100151	0.0342483
Dglucy	0.863071	5.36349	10.8206	0.00100379	0.0342732
Mtnr1a	1.62608	1.86395	10.8122	0.00100836	0.034376
Tesk2	-0.851354	3.59076	10.7993	0.00101536	0.0345614
Fgf1	-0.744787	6.33826	10.7953	0.0010176	0.0345656
Trim30a	1.26045	2.46275	10.7934	0.00101861	0.0345656
Lrrc39	1.67745	1.1826	10.7852	0.00102315	0.0346664
Adcy9	-1.11513	3.69114	10.7618	0.00103616	0.0350532
Gngt1	1.96494	0.622153	10.7406	0.00104808	0.0353545
Tmem97	-0.833488	6.10598	10.7403	0.00104827	0.0353545
Ptpn7	2.69049	-0.639796	10.7146	0.00106295	0.0357952
Ncf2	1.93341	1.44546	10.7087	0.00106632	0.0358073
Plcxd2	-1.09641	6.33498	10.7083	0.00106655	0.0358073
Gm12185	3.03223	-0.730863	10.6735	0.00108678	0.0364312
Cd68	1.17996	2.66039	10.6707	0.00108846	0.0364319
Cspg5	-1.75269	1.06193	10.6667	0.0010908	0.036455
1700056E22Rik	2.38348	0.0746085	10.6446	0.00110394	0.0368386
Ifitm3	1.04796	7.85335	10.629	0.0011133	0.037068
Emp2	-1.30962	2.67517	10.6253	0.00111552	0.037068
Acaa1b	1.08568	10.6933	10.6247	0.00111585	0.037068
Lbr	-0.890887	3.42495	10.6207	0.00111826	0.0370923
Scpep1	-0.867559	5.02018	10.5996	0.00113112	0.0374627
Chd1l	0.801553	3.68354	10.583	0.00114134	0.0377445
Plau	1.8439	0.337488	10.5763	0.00114548	0.0378248
Arhgef2	1.15003	2.36694	10.5699	0.00114943	0.0378891
Atrnl1	-0.97453	4.95224	10.5676	0.00115086	0.0378891
Gm20708	5.39993	2.87659	10.5486	0.00116277	0.0381857
Gbp5	1.50398	0.986189	10.5477	0.00116332	0.0381857
Arhgap42	-0.731692	6.09893	10.5426	0.00116652	0.0382337
Pex11g	0.861245	4.96725	10.5306	0.00117416	0.0384271
Gm42878	-5.98327	-0.214378	10.5013	0.00119292	0.0389835
Zxdc	-0.877175	3.3513	10.4949	0.00119703	0.0390599
Sgsm1	-1.52636	1.69299	10.4896	0.00120048	0.0391146
Ankrd33b	-0.769362	4.95387	10.4847	0.00120368	0.0391614
Tafa2	-3.49239	0.116766	10.4816	0.0012057	0.0391693
Khk	0.990913	8.52181	10.4681	0.00121455	0.0393988
Elf4	1.50168	1.28932	10.4619	0.00121859	0.039472
Cd72	1.7232	2.19835	10.4573	0.00122168	0.0395141
Rhbdf1	1.12837	2.74654	10.4506	0.00122609	0.0395987
Gyg	1.14468	2.26583	10.4466	0.00122873	0.039626
Tmc5	3.31132	1.62102	10.4394	0.00123355	0.0396945
Abcc4	-1.68315	2.25007	10.4381	0.00123444	0.0396945
Eif4e3	1.69571	2.7839	10.4338	0.00123733	0.0397293
Slc1a4	1.2075	3.14414	10.4229	0.0012446	0.039905
Gstp2	-1.29797	4.58522	10.4068	0.00125554	0.0401185
Cry2	-0.795486	4.61314	10.406	0.00125607	0.0401185
Sat1	0.766687	5.72444	10.398	0.00126151	0.0401185
Tgm1	-1.22975	2.87787	10.3964	0.00126262	0.0401185
Tspan4	-0.791129	5.11668	10.3958	0.00126303	0.0401185
Pira2	1.60159	0.630357	10.3955	0.00126326	0.0401185
Rnase6	2.22382	-0.296595	10.3944	0.00126398	0.0401185
Matk	2.36649	-0.208517	10.3844	0.00127085	0.0402398
4933411K16Rik	-1.36804	1.91088	10.3835	0.00127144	0.0402398
Isoc2b	0.961606	3.50388	10.374	0.00127806	0.0403914
Tafa5	1.84202	1.43269	10.369	0.00128151	0.0404426
Cd2	2.84527	-0.557462	10.3625	0.00128602	0.040527
Oas2	1.99043	2.76135	10.3513	0.00129384	0.0407153
Tnfaip3	1.23101	2.20449	10.3428	0.00129982	0.040792
Itgb2	1.28768	2.76943	10.3403	0.00130158	0.040792
Hsd17b10	0.885894	7.02414	10.34	0.00130181	0.040792
Gas6	0.701154	5.17366	10.3251	0.00131234	0.0410389
Cd83	1.84857	0.254781	10.3236	0.00131341	0.0410389
Sufu	-1.19999	2.32316	10.3171	0.00131801	0.0411244
Bmp7	2.02029	0.678358	10.3111	0.00132233	0.0412012
Thbs1	1.84584	0.779222	10.3075	0.00132493	0.0412138
Ccdc88b	1.47734	1.16086	10.3053	0.00132647	0.0412138
Prph	4.38812	-1.27895	10.2803	0.00134458	0.0416735
Ccl4	2.48318	-0.502183	10.2797	0.00134504	0.0416735
Hk2	1.96769	1.05508	10.2721	0.00135059	0.0417868
Marveld3	-2.0171	0.88874	10.2623	0.00135776	0.04195
Cybb	1.20222	3.78519	10.2592	0.00136007	0.0419627
Rasl11b	-1.74871	0.948886	10.2446	0.00137088	0.0422372
Cd81	0.845248	7.89924	10.2413	0.00137333	0.0422538
mt-Co2	1.55369	13.0217	10.2247	0.00138574	0.0425762
Syk	1.26348	2.52463	10.202	0.00140285	0.0430423
Pdrg1	0.767185	4.11567	10.1937	0.00140924	0.0431784
Ksr2	2.62868	-0.463733	10.1816	0.0014185	0.043354
Bst2	0.841045	6.74116	10.179	0.00142048	0.043354
mt-Co3	1.49313	12.4638	10.1785	0.00142086	0.043354
Fcer1g	1.21289	2.50504	10.1677	0.00142922	0.0435488
B4galnt1	-0.69327	5.92433	10.1468	0.00144555	0.0439858
Cldn14	-0.983077	3.25215	10.1366	0.00145357	0.0441528
Pou2f2	1.652	2.56774	10.1347	0.00145504	0.0441528
Ccl5	2.74285	0.100443	10.1236	0.00146382	0.0443583
Cdh1	-1.62158	4.96741	10.1184	0.00146797	0.0444015
Depdc5	-0.849991	3.45245	10.1154	0.00147038	0.0444015
Casp3	-0.931776	4.30524	10.1142	0.00147127	0.0444015
Postn	1.32681	2.53474	10.1083	0.00147606	0.0444853
Stat1	0.752941	5.50161	10.1041	0.00147938	0.0445245
Smc2	1.19606	2.4507	10.0946	0.00148706	0.0446732
1810037I17Rik	0.777494	3.9719	10.0922	0.00148902	0.0446732
Itpr2	-0.742887	5.47874	10.0905	0.00149039	0.0446732
Fbln2	1.35937	1.30827	10.0782	0.00150036	0.0449112
Phospho1	0.922817	4.33702	10.0703	0.00150678	0.0450423
Cyp1a2	-0.984287	8.91258	10.0568	0.0015179	0.0453133
Lax1	2.40951	-0.55048	10.0518	0.00152197	0.0453735
H2aj	1.04277	5.60489	10.0169	0.00155107	0.0461185
Ctse	3.3554	5.01242	10.0169	0.00155113	0.0461185
Rad51c	-2.41526	0.611485	10.005	0.00156117	0.0463545
Uba7	1.10564	3.4871	10.0019	0.00156382	0.046371
Osgin1	-0.860811	6.98491	9.99445	0.00157013	0.0464956
Gjc3	-1.53615	0.906191	9.98536	0.0015779	0.046638
Ucp3	4.52128	-1.17526	9.98389	0.00157916	0.046638
Nectin4	4.59885	-1.21012	9.97655	0.00158547	0.0467618
Pianp	2.40952	-0.0958706	9.96953	0.00159152	0.0468776
Gpr132	2.93077	-0.46482	9.94961	0.00160883	0.0473246
Sptb	-1.90496	0.859024	9.93801	0.00161901	0.0475605
Aim2	1.7166	0.770361	9.93285	0.00162355	0.0475804
Cox19	0.93347	5.21593	9.93235	0.00162399	0.0475804
Ssbp4	1.56163	2.07228	9.91324	0.00164094	0.0480132
Hcfc1r1	0.804146	4.6149	9.90003	0.00165276	0.0482952
Wdtc1	-0.697885	6.1985	9.88741	0.00166413	0.0485633
Gtf2h5	1.01565	4.88452	9.87839	0.00167232	0.0487376
Prep	-0.859102	5.1899	9.86404	0.00168541	0.0490545
Abca2	-0.84524	5.69773	9.85952	0.00168955	0.0491103
Hypk	0.898885	3.46823	9.85124	0.00169717	0.0492671
Pet100	1.11508	3.9983	9.84423	0.00170365	0.0493348
Usp24	-0.786492	6.60122	9.84388	0.00170397	0.0493348
Vps37d	3.26499	-1.02932	9.82585	0.00172076	0.0497463
Samhd1	0.707698	4.56915	9.82379	0.00172269	0.0497463
Kif13b	-0.713467	5.84723	9.81354	0.00173232	0.0499592
